# Supplementary material for: Conservation Genetics of the Loggerhead Sea Turtle, Caretta caretta, from the Central Mediterranean: An Insight into the Species’ Reproductive Behaviour in Maltese Waters
Source: MDPI journal article supplement (doi:10.3390/ani14010137), 2023-12-30
Supplement: s1 [file s1]

# Conservation Genetics of the Loggerhead Sea Turtle, *Caretta caretta*, from the Central Mediterranean: An Insight into the Species' Reproductive Behaviour in Maltese Waters

Adriana Vella, Noel Vella

Conservation Biology Research Group, Department of Biology, Faculty of Science, University of Malta  
Email: adriana.vella@um.edu.mt

## Supplementary material

**Table S1: List of primer, sequences (forward and reverse primers, including M13 sequence), fluorescent dye used and references.**

| Primer                      | Sequence 5' – 3'<br>(including M13 as used in this study)                  | Fluorescent dye | Reference                         |
|-----------------------------|----------------------------------------------------------------------------|-----------------|-----------------------------------|
| <b>Dinucleotide loci</b>    |                                                                            |                 |                                   |
| cc141                       | F CAGCAGGCTGTCAGTTCTCCAC<br>R GGAAACAGCTATGACCATAGTACGTCTGGCCTGACTTT       | PET             | Bowen et al., 2005 [42]           |
| cc7                         | F TGCATTGCTTGACCAATTAGTGAG<br>R GGAAACAGCTATGACCATACATGTATAGTTGAGGAGCAAGTG | VIC             | Fitzsimmons, 1998 [43]            |
| Ccar176                     | F GGCTGGGTGTCCATAAAAGA<br>R GGAAACAGCTATGACCATCCCTAAGTAAAGATTGGCTGCT       | NED             | Moore and Ball, 2002 [44]         |
| cc117                       | F GGAAACAGCTATGACCATCTTTAACGTATCTCCTGTAGCTC<br>R CAGTAGTGTGAGTTCATTGTTTCA  | VIC             | Martin et al., 2002 [45]          |
| Cc-2                        | F GGAAACAGCTATGACCATCCCCCATAACACCACATCTC<br>R AGGTCACAAATGGAGCAAGC         | 6-FAM           | Monzón-Argüello et al., 2008 [46] |
| Cc-8                        | F GGAAACAGCTATGACCATGATGGAAACCCCTTCAAAC<br>R TGTCACGGAGACACAAACATT         | PET             | Monzón-Argüello et al., 2008 [46] |
| Cc-10                       | F TCCACATGGGGTTGTATGAA<br>R GGAAACAGCTATGACCATTGCCCTCCTTGAGAATTCAG         | VIC             | Monzón-Argüello et al., 2008 [46] |
| Cc-17                       | F CCACTGGAAGTCTAAGAAGAGTGC<br>R GGAAACAGCTATGACCATGGAATTGAAGGGATTTTGCT     | NED             | Monzón-Argüello et al., 2008 [46] |
| Cc-22                       | F GGAAACAGCTATGACCATCCCCACTGCTTAACTTCA<br>R TATTCCAACATGCCACAGA            | VIC             | Monzón-Argüello et al., 2008 [46] |
| Cc-25                       | F GGAAACAGCTATGACCATTTTGCTTTCCCATCTGAC<br>R AGCCTCCAGCACAGCATTAT           | VIC             | Monzón-Argüello et al., 2008 [46] |
| Cc-28                       | F AGCCCATATGTTTCCCTTCA<br>R GGAAACAGCTATGACCATTGGCCCATCTTATTTCAAGT         | NED             | Monzón-Argüello et al., 2008 [46] |
| Cc-30                       | F CTTTGGAGGCAGGCTAGTG<br>R GGAAACAGCTATGACCATGAAGCCAGTTGATCAGGAG           | 6-FAM           | Monzón-Argüello et al., 2008 [46] |
| <b>Tetranucleotide loci</b> |                                                                            |                 |                                   |
| Cc1G02                      | F GGAAACAGCTATGACCATAGGTGCCTAAACATTGATAGT<br>R GTTATACTGTGCTCTTTCGTGTAAT   | 6-FAM           | Shamblin et al., 2007 [47]        |
| Cc1G03                      | F GGAAACAGCTATGACCATGGAATGTGCAGAATGTATGT<br>R GTTTAACGAGCATGTATCTAAAGTAA   | NED             | Shamblin et al., 2007 [47]        |

|         |   |                                          |       |                            |
|---------|---|------------------------------------------|-------|----------------------------|
| Cc5H07  | F | GGAAACAGCTATGACCATAAGGAAGGAGAGGCTTATTAC  | NED   | Shamblin et al., 2007 [47] |
|         | R | GTTTGGGCAATGAGACTGGAACCTA                |       |                            |
| Cc7E11  | F | GTTTGAAGAGCTGACCCCATATAG                 | PET   | Shamblin et al., 2007 [47] |
|         | R | GGAAACAGCTATGACCATAAACACAGAAATGAGGGATAG  |       |                            |
| Cc2H12  | F | GGAAACAGCTATGACCATTCTTCAGGAGTTTGTACTTG   | 6-FAM | Shamblin et al., 2007 [47] |
|         | R | GTTTCCACACCCCTGTTTCAGA                   |       |                            |
| Cc7B07  | F | GTTTATAATGTTGGTGAGCAATATAG               | NED   | Shamblin et al., 2007 [47] |
|         | R | GGAAACAGCTATGACCATCAGGAGTTAAACCAGGCACAGT |       |                            |
| Cc7G11  | F | GTTTCTCAGCATGAAAGTGTAATAC                | NED   | Shamblin et al., 2007 [47] |
|         | R | GGAAACAGCTATGACCATGGATTGTTCAGTAATAG      |       |                            |
| Cc8E07  | F | GTTTAGCACTGGGTTGTGTGATTA                 | 6-FAM | Shamblin et al., 2007 [47] |
|         | R | GGAAACAGCTATGACCATAACCACCATTCTGATTGTAG   |       |                            |
| CcP1F09 | F | GGAAACAGCTATGACCATAAATGTTGCCGTTTCTATTG   | 6-FAM | Shamblin et al., 2009 [48] |
|         | R | GTTTCTCCCCAACCTCTCAT                     |       |                            |
| CcP5C11 | F | GTTTCTATTGACACCACTCCACTCT                | PET   | Shamblin et al., 2009 [48] |
|         | R | GGAAACAGCTATGACCATTGATTCTCTCCCTTACA      |       |                            |
| CcP7D04 | F | GGAAACAGCTATGACCATGAGCAAAGTAACCTAACA     | NED   | Shamblin et al., 2009 [48] |
|         | R | GTTTGGAGCCAAATTAGAGATCAAC                |       |                            |
| CcP7F06 | F | GGAAACAGCTATGACCATGACCACCCTCCAGTGAA      | VIC   | Shamblin et al., 2009 [48] |
|         | R | GTTTGTGTTGGTTGATTACTTCTATG               |       |                            |
| CcP7H10 | F | GGAAACAGCTATGACCATCGAGACTCAATAAATACAGAGA | PET   | Shamblin et al., 2009 [48] |
|         | R | GTTTATAACAACACAGCATAAAATAAT              |       |                            |

Microsatellite amplification protocols used followed Monzón-Argüello et al. [46] and Shamblin et al. [47,48].

## References:

42. Bowen, B.W.; Bass, A.L.; Soares, L.; Toonen, R.J. Conservation implications of complex population structure: Lessons from the loggerhead turtle (*Caretta caretta*). *Mol. Ecol.* **2005**, *14*, 2389–2402, doi:10.1111/j.1365-294X.2005.02598.x.
43. Fitzsimmons, N.N. Single paternity of clutches and sperm storage in the promiscuous green turtle (*Chelonia mydas*). *Mol. Ecol.* **1998**, *7*, 575–584, doi:10.1046/j.1365-294x.1998.00355.x.
44. Moore, M.K.; Ball, R.M. Multiple paternity in loggerhead turtle (*Caretta caretta*) nests on Melbourne Beach, Florida: A microsatellite analysis. *Mol. Ecol.* **2002**, *11*, 281–288, doi:10.1046/j.1365-294X.2002.01426.x.
45. Martin, A.P.; Pardini, A.T.; Noble, L.R.; Jones, C.S. Conservation of a dinucleotide simple sequence repeat locus in sharks. *Mol. Phylogenet. Evol.* **2002**, *23*, 205–213, doi:10.1016/S1055-7903(02)00001-5.
46. Monzón-Argüello, C.; Muñoz, J.; Marco, A.; López-Jurado, L.F.; Rico, C. Twelve new polymorphic microsatellite markers from the loggerhead sea turtle (*Caretta caretta*) and cross-species amplification on other marine turtle species. *Conserv. Genet.* **2008**, *9*, 1045–1049, doi:10.1007/s10592-007-9446-4.
47. Shamblin, B.M.; Faircloth, B.C.; Dodd, M.; Wood-Jones, A.; Castleberry, S.B.; Carroll, J.P.; Nairn, C.J. Tetranucleotide microsatellites from the loggerhead sea turtle (*Caretta caretta*). *Mol. Ecol. Notes*

2007, 7, 784–787, doi:10.1111/j.1471-8286.2007.01701.x.

48. Shamblin, B.M.; Faircloth, B.C.; Dodd, M.G.; Bagley, D.A.; Ehrhart, L.M.; Dutton, P.H.; Frey, A.; Nairn, C.J. Tetranucleotide markers from the loggerhead sea turtle (*Caretta caretta*) and their cross-amplification in other marine turtle species. *Conserv. Genet.* **2009**, *10*, 577–580, doi:10.1007/s10592-008-9573-6.
